# Supplementary material
Source: HighWire-hosted journal article supplement (https://bmjopen.bmj.com/highwire/filestream/93949/field_highwire_adjunct_files/5/FIGURE_A5.pdf)

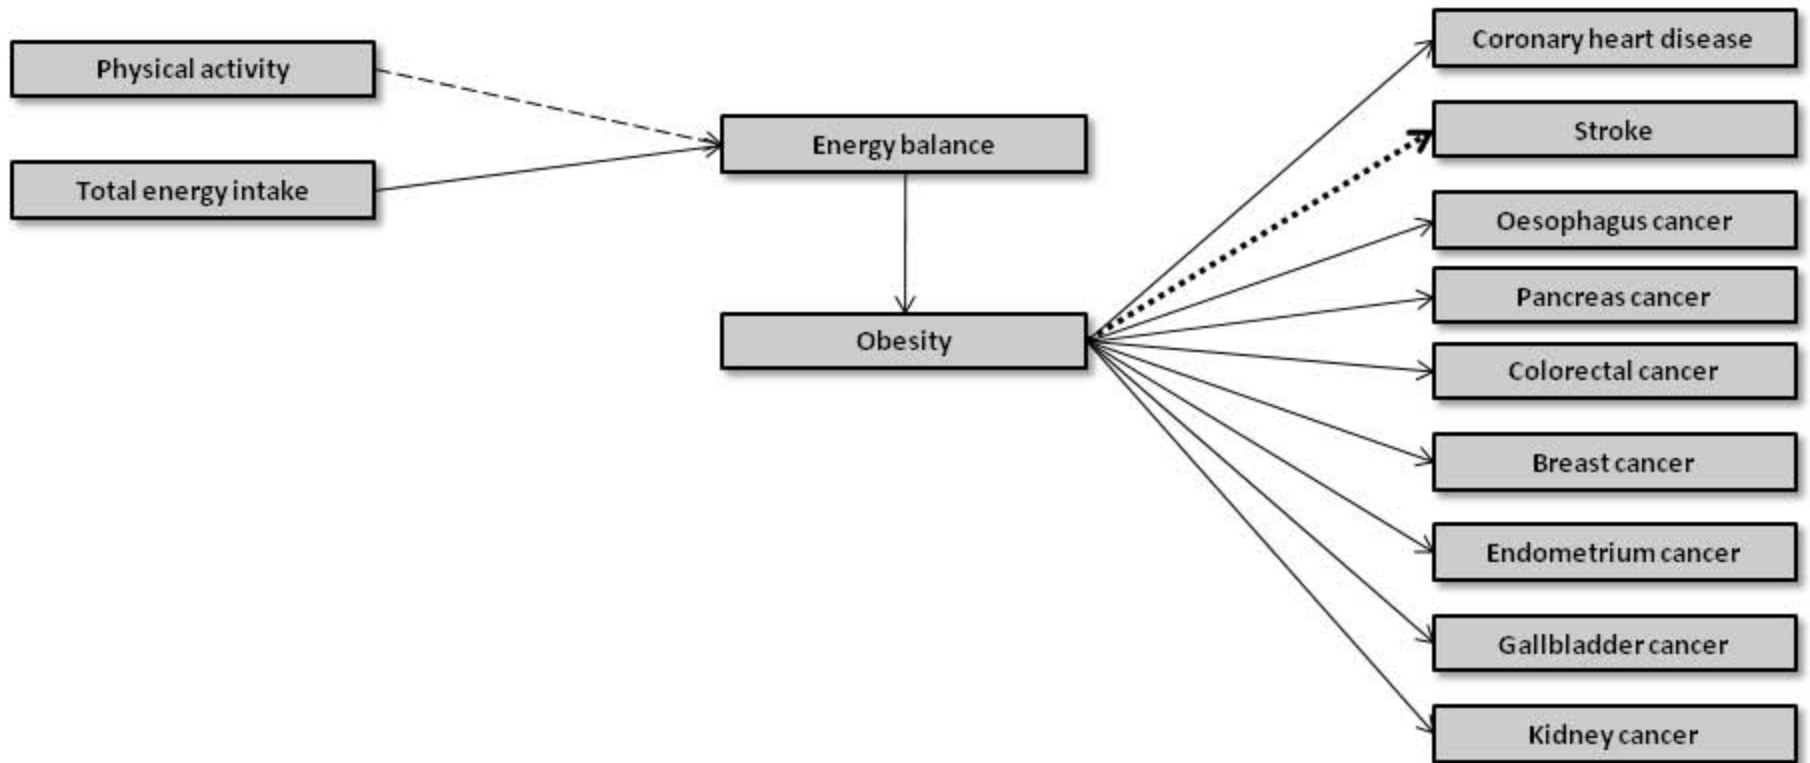

Supplement: FIGURE_A5.pdf [file FIGURE_A5.pdf]
